# Supplementary material for: Dual-Armed Oncolytic Myxoma Virus Encoding IFN-γ and CD47 Promotes Lymphocyte Infiltration and Tumor Suppression of Syngeneic Murine Melanoma
Source: MDPI journal article supplement (doi:10.3390/cancers15194703), 2023-09-24
Supplement: s1 [file s1]

# Supplementary Data

**Dual-Armed Oncolytic Myxoma Virus Encoding IFN- $\gamma$   
and CD47 Promotes Lymphocyte Infiltration and  
Tumor Suppression of Syngeneic Murine Melanoma**

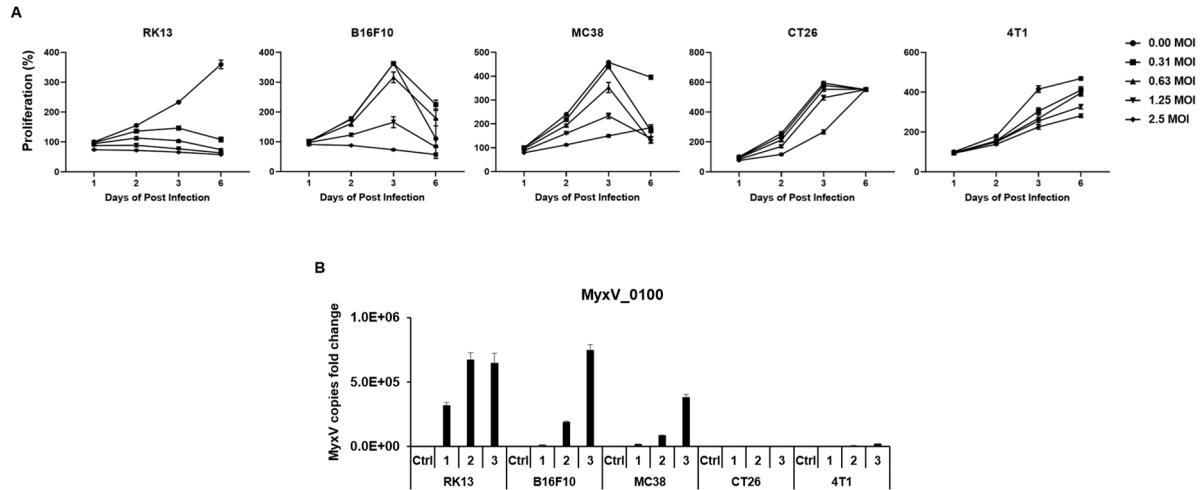

**Figure S1. Oncolytic and replication activity of MyxV\_0100 in murine cancer cell lines**

**A.** Graphs show the relative proliferation rates of four different murine cancer cell lines and a rabbit-derived cell line RK13 when infected with different MOI of MyxV\_0100 for 1-, 2-, 3-, and 6- days post-infection, respectively. **B.** RK13 and murine cancer cell lines B16F10, MC38, CT26, and 4T1 were used for virus amplification. The cells were infected with 0.2MOI of MyxV\_0100, and PCR analysis was conducted at 1, 2, and 3 days of post-infection. Virus amplification was compared with the uninfected control.  $\beta$ -actin was used as an internal control.

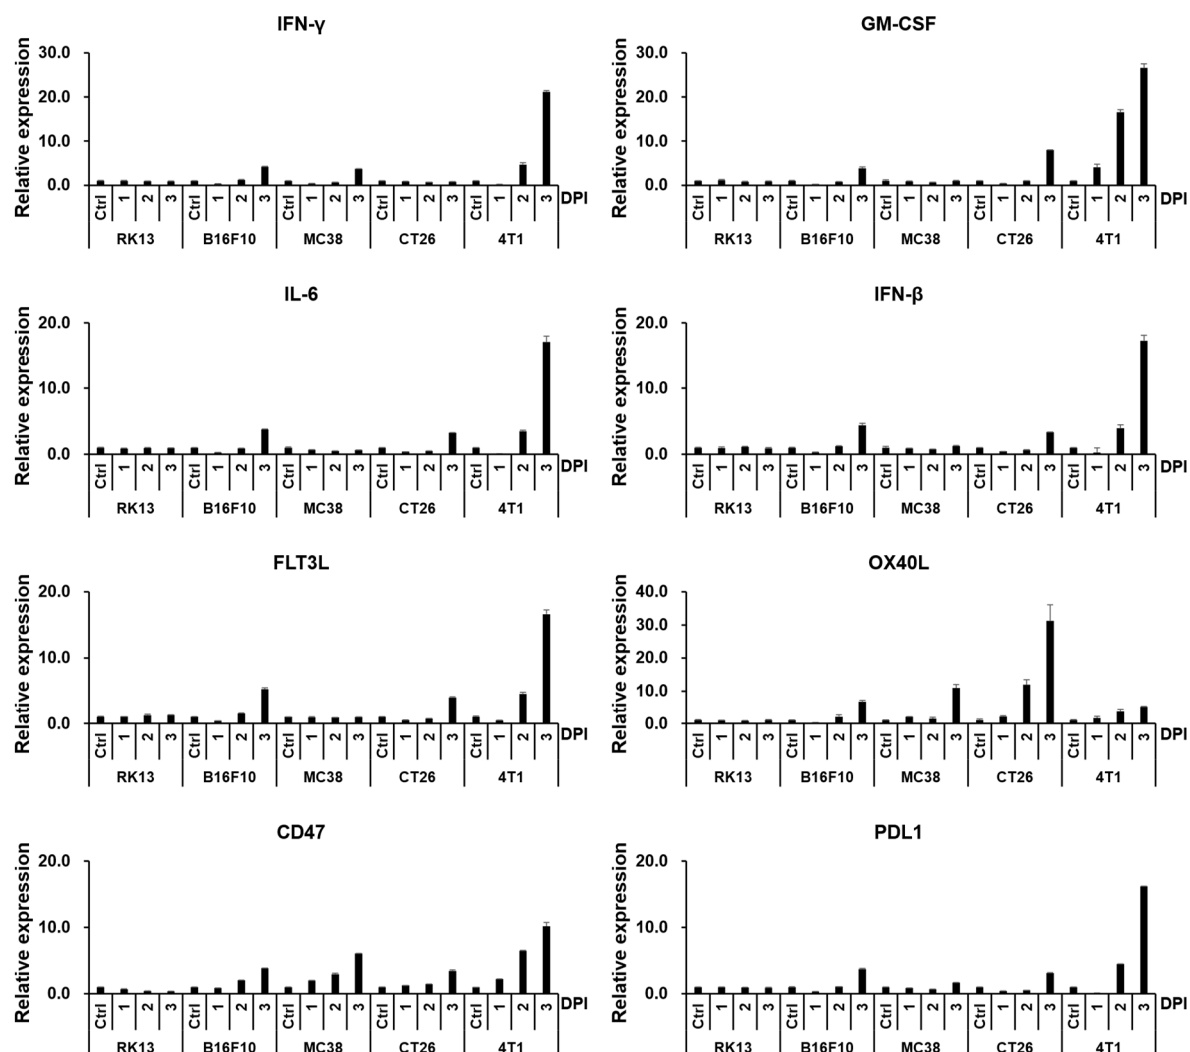

**Figure S2. Expression of cytokines and the immune checkpoint-related genes in MyxV\_0100 infected murine cancer cell lines**

RK13 and murine cancer cell lines B16F10, MC38, CT26, and 4T1 were used for qPCR analysis. The cells were infected with 0.2MOI of MyxV\_0100, and qPCR analysis was conducted at 1-, 2-, and 3-days post-infection. The expression of cytokines or cell receptors was compared with the uninfected control.  $\beta$ -actin was used as an internal control.

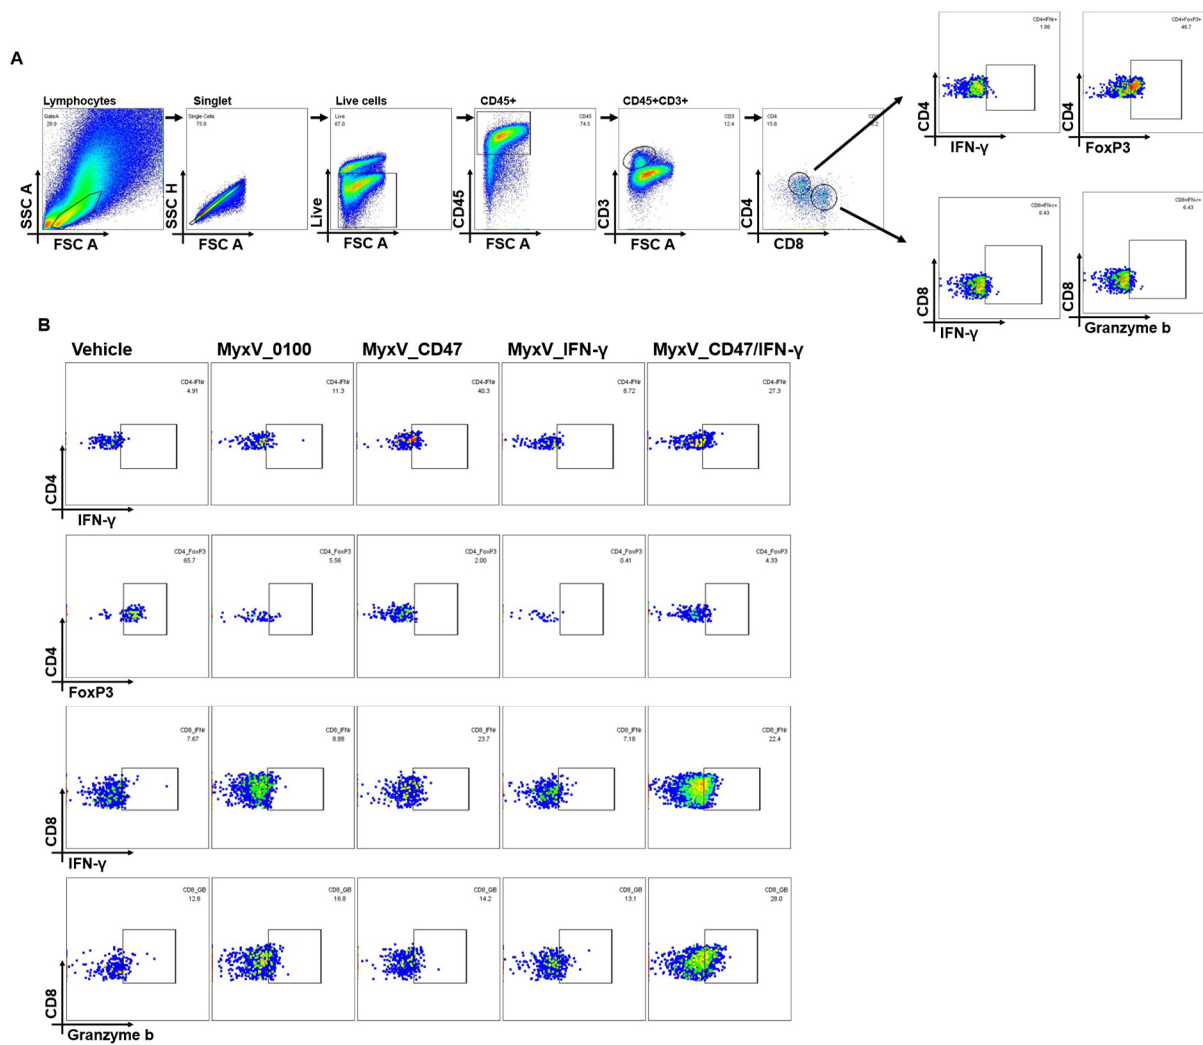

**Figure S3. FACS analyses of tumor-infiltrated T-cell subsets in tumor.**

A. Gating strategy for phenotypic analysis of T-cell subsets in the tumor. B. Representative FACS plot of T-cell subsets (CD4<sup>+</sup> IFN-γ<sup>+</sup>, CD4<sup>+</sup> Foxp3<sup>+</sup>, CD8<sup>+</sup> IFN-γ<sup>+</sup>, and CD8<sup>+</sup> Granzyme b<sup>+</sup>).

**Table S1. Primer List**

| Gene           | 5' → 3' | Sequence                  | Size (bp) | Gene ID        |
|----------------|---------|---------------------------|-----------|----------------|
| Myxoma virus   | Forward | GTTGGTAATTTCAATTCGTACCA   | 119       | NC_001132.2    |
|                | Reverse | GGTAAACAATTAATCCGTTGTAA   |           |                |
| IFN- $\gamma$  | Forward | AGCCTCAGGAAGCGGAAAAG      | 354       | NM_008337.4    |
|                | Reverse | TGAGTTCAGTCAGCCGCTTG      |           |                |
| GM-CSF         | Forward | GGCTGCAGAATTTACTTTTCCTGGG | 366       | NM_009969.4    |
|                | Reverse | GGCTGTCTATGAAATCCGCATAGG  |           |                |
| IL-6           | Forward | GAGGATACTCACTCCCAACAGACC  | 141       | NM_031168.2    |
|                | Reverse | AAGTGCATCATCGTTGTTCATACA  |           |                |
| IFN- $\beta$   | Forward | CAACAGGTGGATCCTCCACG      | 446       | NM_010510.2    |
|                | Reverse | GTTTAAGGTACCTTTGCACCCTCC  |           |                |
| FLT3L          | Forward | CAGCCTGGAGCCCAAATTCC      | 599       | NM_001402831.1 |
|                | Reverse | CAGCAGCACCAGTGTGAGAGG     |           |                |
| OX40L          | Forward | GGAAGGGGTTCAACCCCTGG      | 543       | U12763.1       |
|                | Reverse | GCACAGTATCCAGGCGTTAGC     |           |                |
| CD47           | Forward | CCATATTGATCACTCAAGTGC     | 129       | AB012693.1     |
|                | Reverse | GTTCTGCTAGAGCTATGATC      |           |                |
| PD-L1          | Forward | GCTGGCATTATATTCACAGC      | 378       | GQ904196.1     |
|                | Reverse | GACTTTCAGCGTGATTCTG       |           |                |
| $\beta$ -Actin | Forward | TGGAATCCTGTGGCATCCATGAAAC | 349       | NM_007393.5    |
|                | Reverse | TAAAACGCAGCTCAGTAACAGTCCG |           |                |

**Table S2. Antibody List**

| Antibody Name                        | Clone    | Company     | Cat No.    | Usage    |
|--------------------------------------|----------|-------------|------------|----------|
| Anti-CD47 APC                        | miap301  | eBioscience | 17-0471-82 | IF       |
| Anti-CD47 FITC                       | miap301  | eBioscience | 11-0471-82 | FACS     |
| Anti-IFN- $\gamma$ PE                | XMG1.2   | eBioscience | 12-7311-82 | IF       |
| Anti-IFN- $\gamma$ APC               | XMG1.2   | eBioscience | 17-7311-82 | FACS     |
| Anti-CD45 Super Bright™ 780          | 30-F11   | eBioscience | 78-0451-82 | FACS     |
| Anti-CD3e APC-eFluor™ 780            | 145-2C11 | eBioscience | 47-0031-82 | FACS     |
| Anti-CD4 FITC                        | GK1.5    | eBioscience | 11-0041-82 | FACS, IF |
| Anti-CD8a Super Bright™ 645          | 53-6.7   | eBioscience | 64-0081-82 | FACS, IF |
| Anti-FoXP3 eFluor™ 450               | FJK-16s  | eBioscience | 48-5773-82 | FACS     |
| Anti-Granzyme B PerCP-eFluor™ 710    | NGZB     | eBioscience | 46-8898-82 | FACS     |
| Anti-CD8 alpha antibody              | EPR21769 | abcam       | ab217344   | IHC      |
| Anti-CD4 antibody                    | EPR19514 | abcam       | ab183685   | IHC      |
| Anti-CD11c antibody Alexa Fluor® 594 | N418     | Biolegend   | 117346     | IF       |
